# Supplementary material
Source: publisher figshare collection journal article supplement (https://plos.figshare.com/articles/dataset/_/1475874)
Supplement: Supplementary file [file 1]

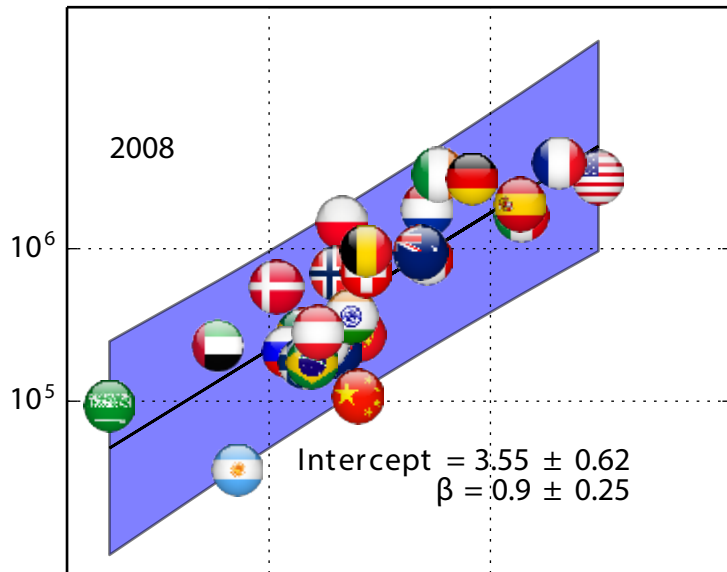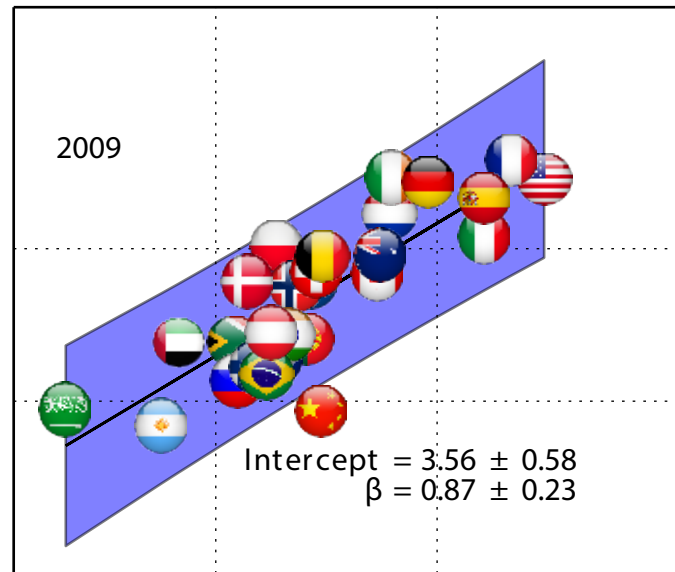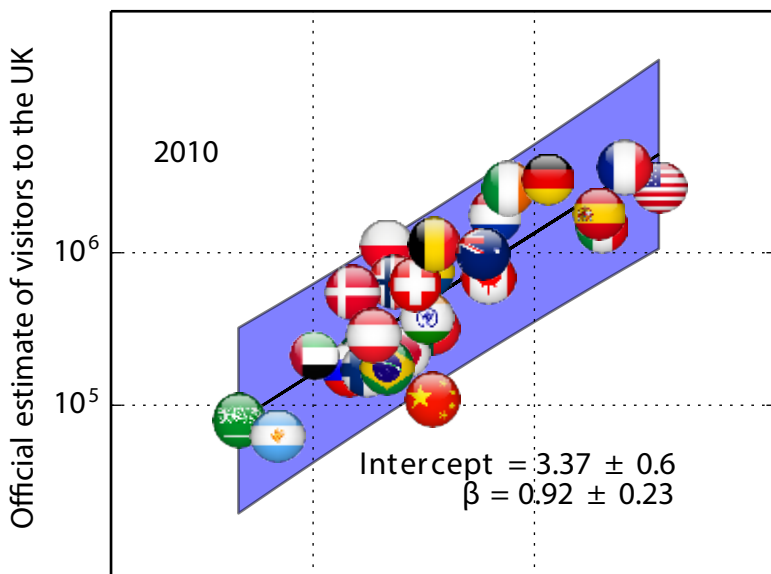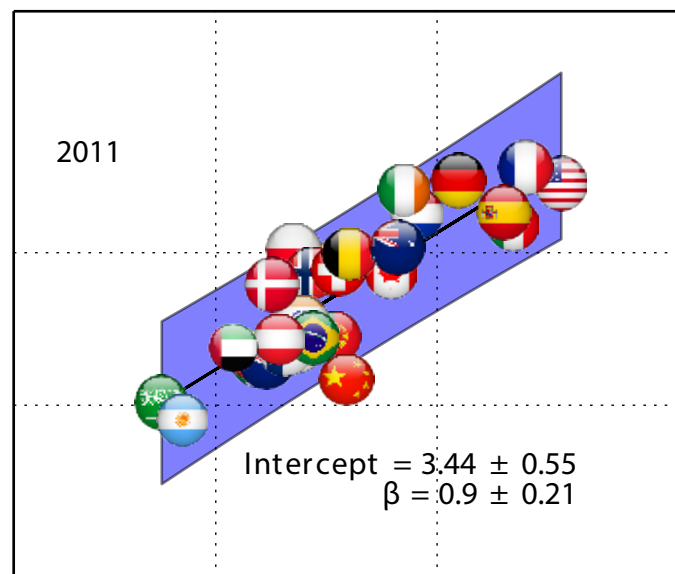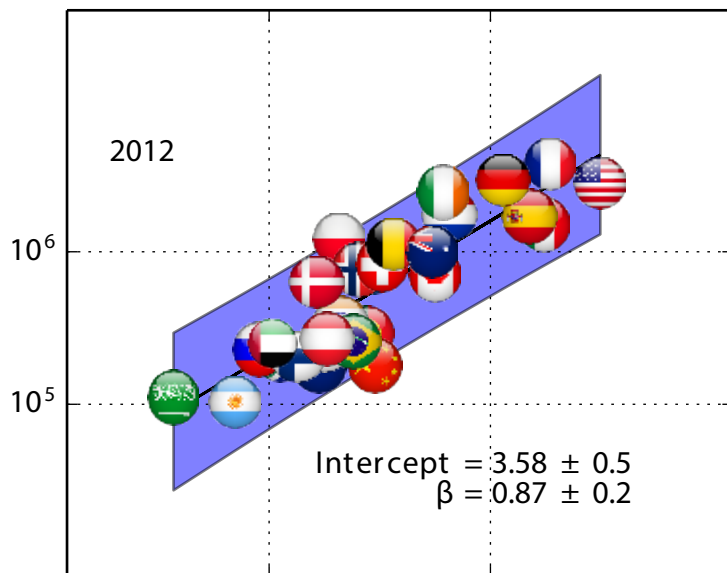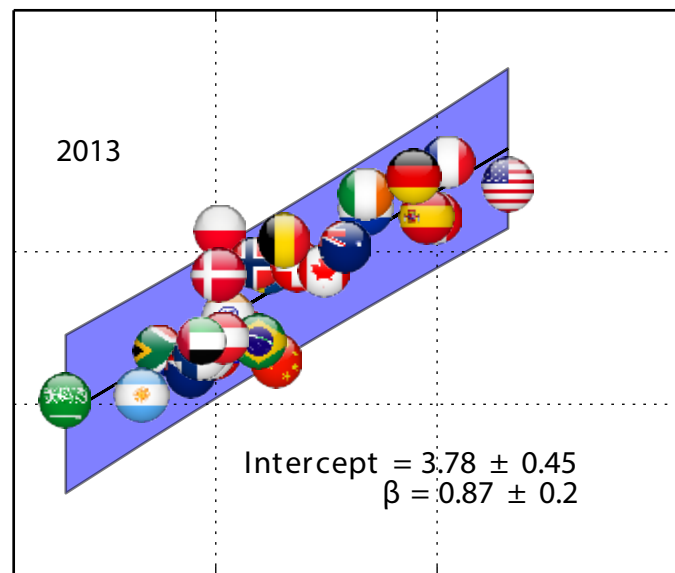

Detected number of Flickr users visiting the UK

Official estimate of visitors to the UK
